# Supplementary material for: Exploring the Molecular Basis of Vesicular Stomatitis Virus Pathogenesis in Swine: Insights from Expression Profiling of Primary Macrophages Infected with M51R Mutant Virus
Source: MDPI journal article supplement (doi:10.3390/pathogens12070896), 2023-06-30
Supplement: s1 [file s1]

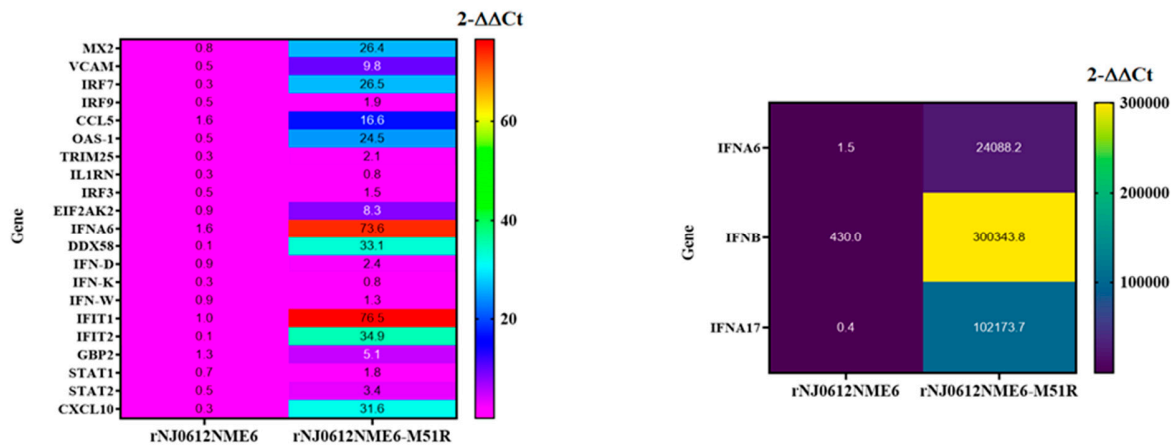

**Figure S1.** qPCR validation of some relevant genes.

| Group                 | Gene         | EXP  | M/W  | FDR  | M/N  | FDR  |
|-----------------------|--------------|------|------|------|------|------|
| IFNs                  | IFNAs * (18) | 92   | 22.8 | 0.00 | 23.7 | 0.00 |
|                       | IFNB         | 179  | 6.9  | 0.01 | 42.5 | 0.00 |
|                       | IFND         | 94   | 8.5  | 0.00 | 11.5 | 0.00 |
|                       | IFNK         | 69   | 1.5  | 0.03 | 1.5  | 0.10 |
|                       | IFNW         | 62   | 2.2  | 0.00 | 1.9  | 0.03 |
|                       | IFNG         | 205  | -1.4 | 0.89 | 1.7  | 0.88 |
|                       | IFNL         | 147  | 10.7 | 0.00 | 13.0 | 0.00 |
| IFN signaling pathway | IFNAR1       | 3774 | 2.3  | 0.01 | -1.3 | 0.77 |
|                       | IFNAR2       | 2223 | 8.0  | 0.00 | 2.8  | 0.08 |
|                       | IFNGR1       | 1000 | 2.0  | 0.04 | -1.3 | 0.75 |
|                       | JAK2         | 215  | 4.4  | 0.00 | 3.2  | 0.00 |
|                       | IRF9         | 634  | 5.5  | 0.00 | 3.2  | 0.00 |
|                       | STAT1        | 4650 | 1.6  | 0.02 | 1.8  | 0.04 |
|                       | STAT2        | 2794 | 4.5  | 0.00 | 5.2  | 0.00 |

**Table S1.** Expression levels (EXP), false discovery rates (FDR) and fold differences (mutant vs WT, M/W and mutant vs mock infection, (M/N) of interferon related genes differentially expressed by infected macrophages. \* The results were the average of 17 IFNA probes.

| Group                          | Gene      | EXP  | M/W   | FDR  | M/N  | FDR  |
|--------------------------------|-----------|------|-------|------|------|------|
| Viral RNA sensor or enhancer   | MDA5      | 231  | 44.1  | 0.00 | 74.2 | 0.00 |
|                                | RIG-I     | 154  | 24.5  | 0.00 | 21.6 | 0.00 |
|                                | ZNFX1     | 1500 | 14.2  | 0.00 | 10.1 | 0.00 |
|                                | TRIM25    | 296  | 6.3   | 0.00 | 5.2  | 0.00 |
| Signal transducer              | MAVS/IPS1 | 452  | 1.8   | 0.03 | -1.1 | 0.88 |
|                                | TBK1      | 459  | 3.0   | 0.00 | 1.5  | 0.46 |
|                                | IKBKE     | 1575 | 1.9   | 0.02 | 1.3  | 0.72 |
| Transcription factor           | IRF3      | 194  | 1.7   | 0.13 | 1.6  | 0.37 |
|                                | IRF5      | 3796 | 2.2   | 0.00 | 1.0  | 0.98 |
|                                | IRF7      | 435  | 5.2   | 0.00 | 5.6  | 0.00 |
|                                | IRF8      | 2039 | 4.5   | 0.00 | 3.3  | 0.01 |
| IFN expression inhibitory gene | AHR       | 193  | -6.0  | 0.00 | 1.0  | 1.00 |
|                                | DUSP1     | 2208 | -13.9 | 0.00 | -1.0 | 1.00 |
|                                | HES1      | 218  | -14.0 | 0.00 | -1.3 | 0.92 |
|                                | PRDM1     | 158  | -4.1  | 0.02 | 1.5  | 0.81 |
| NFκB inhibitory gene           | FOS       | 1993 | -18.0 | 0.00 | 1.3  | 0.94 |
|                                | FOSL2     | 790  | -5.0  | 0.00 | 1.2  | 0.91 |

**Table S2.** Expression levels (EXP), false discovery rates (FDR) and fold differences (mutant vs wildtype, M/W and mutant vs mock infection, M/N) of differentially expressed genes in cytosolic pattern recognition receptor signaling pathways or with inhibitory effect on IFN expression.

| Group                           | Gene   | EXP  | M/W  | FDR  | M/N  | FDR  |
|---------------------------------|--------|------|------|------|------|------|
| IFN signaling suppressor        | SOCS1  | 549  | 11.6 | 0.00 | 7.2  | 0.02 |
|                                 | SOCS3  | 9021 | 2.1  | 0.01 | 2.3  | 0.02 |
|                                 | USP18  | 1176 | 12.4 | 0.00 | 9.3  | 0.01 |
| RIG-I-like signaling suppressor | IRF2   | 323  | 5.7  | 0.00 | 3.6  | 0.01 |
|                                 | NLRC5  | 368  | 5.0  | 0.00 | 4.3  | 0.00 |
|                                 | TRIM13 | 322  | 3.0  | 0.04 | -1.2 | 0.89 |
|                                 | TRIM21 | 149  | 4.9  | 0.00 | 4.3  | 0.01 |
|                                 | TRIM26 | 1024 | 7.5  | 0.00 | 3.4  | 0.01 |
|                                 | TRIM38 | 1448 | 5.7  | 0.00 | 2.8  | 0.01 |

**Table S3.** Expression levels (EXP), false discovery rates (FDR) and fold differences (mutant vs WT, M/W and mutant vs mock infection, M/N) of differentially expressed genes with suppressive effects on IFN and RIG-I-like signaling.

| Group              | Gene     | EXP  | M/W  | FDR  | M/N  | FDR  |
|--------------------|----------|------|------|------|------|------|
| Cytokines          | CSF2     | 273  | -5.8 | 0.04 | -1.0 | 0.99 |
|                    | IL1RN    | 922  | 22.7 | 0.00 | 23.8 | 0.02 |
|                    | IL15     | 162  | 6.2  | 0.00 | 12.1 | 0.00 |
|                    | IL18     | 651  | 5.1  | 0.01 | 8.1  | 0.01 |
|                    | IL27     | 318  | 3.2  | 0.01 | 12.1 | 0.00 |
|                    | LIF      | 217  | -5.2 | 0.02 | 2.5  | 0.50 |
|                    | TNFSF13B | 1506 | 8.2  | 0.00 | 4.8  | 0.00 |
|                    | IL1B     | 2568 | 3.5  | 0.39 | 25.3 | 0.05 |
|                    | IL10     | 1109 | -1.0 | 0.98 | 11.1 | 0.00 |
|                    | IL1R2    | 219  | -2.5 | 0.04 | 1.2  | 0.92 |
| Cytokine receptors | IL1RAP   | 508  | 3.8  | 0.01 | 1.5  | 0.69 |
|                    | IL4R     | 3136 | 2.4  | 0.04 | 1.0  | 1.00 |
|                    | IL7R     | 471  | 9.6  | 0.00 | 21.7 | 0.00 |
|                    | IL15RA   | 377  | 7.8  | 0.00 | 5.7  | 0.03 |
|                    | IL20RB   | 92   | -2.2 | 0.04 | 1.2  | 0.85 |
|                    | IL10RA   | 672  | 5.1  | 0.00 | 3.0  | 0.01 |

**Table S4.** Expression levels (EXP), false discovery rates (FDR) and fold differences (mutant vs WT, M/W and mutant vs mock infection, M/N) of cytokine, chemokine and the receptor genes differentially expressed by infected macrophages.

| Group                  | Gene            | EXP   | M/W   | FDR  | M/N  | FDR  |
|------------------------|-----------------|-------|-------|------|------|------|
| CCLs                   | CCL3            | 2336  | -1.1  | 0.94 | 6.7  | 0.03 |
|                        | CCL4            | 3028  | 1.4   | 0.79 | 42.1 | 0.00 |
|                        | CCL5            | 6487  | 1.6   | 0.50 | 4.8  | 0.02 |
|                        | CCL20           | 412   | 1.6   | 0.75 | 28.5 | 0.01 |
|                        | CCL8            | 5867  | 5.5   | 0.03 | 6.2  | 0.09 |
| ELR+ CXCLs             | CXCL1           | 1791  | -7.2  | 0.01 | -1.1 | 0.97 |
|                        | CXCL2           | 3008  | -6.1  | 0.02 | 3.5  | 0.34 |
|                        | CXCL3           | 2388  | -4.6  | 0.03 | 1.5  | 0.84 |
|                        | CXCL5           | 1786  | -1.4  | 0.03 | -1.1 | 0.89 |
|                        | CXCL6           | 1723  | -1.4  | 0.07 | 1.0  | 0.96 |
|                        | CXCL8           | 2000  | 2.4   | 0.36 | 13.2 | 0.02 |
|                        | ELR+CXCLs *     | 12695 | -2.3  | n/a  | 1.9  | n/a  |
| ELR- CXCLs             | CXCL9           | 194   | 12.2  | 0.00 | 15.7 | 0.00 |
|                        | CXCL10          | 10463 | 54.3  | 0.00 | 15.3 | 0.16 |
|                        | CXCL11          | 126   | 52.5  | 0.00 | 43.0 | 0.00 |
|                        | CXCL(9,10,11) * | 10783 | 50.6  | n/a  | 15.4 | n/a  |
|                        | CXCL13          | 70    | 2.1   | 0.00 | 2.3  | 0.01 |
|                        | CXCL14          | 2061  | 1.6   | 0.05 | -1.0 | 0.96 |
|                        | CXCL16          | 5676  | 1.7   | 0.02 | 1.9  | 0.04 |
| Chemokine<br>receptors | CCR5            | 246   | 6.5   | 0.00 | 2.3  | 0.10 |
|                        | CCR7            | 206   | -4.3  | 0.00 | 1.0  | 0.98 |
|                        | CCRL2           | 1839  | 7.0   | 0.00 | 4.0  | 0.00 |
|                        | CXCR4           | 1060  | -10.8 | 0.00 | -2.5 | 0.23 |

**Table S5.** Expression levels (EXP), false discovery rates (FDR) and fold differences (mutant vs WT, M/W and mutant vs mock infection, M/N) of chemokine and receptor genes differentially expressed by infected macrophages. \*<sup>1</sup> The results were the sums of the gene groups, and the fold differences were normalized with gene expression levels.

| MHC                         | Group         | Gene    | EXP   | M/W  | FDR  | M/N  | FDR  |
|-----------------------------|---------------|---------|-------|------|------|------|------|
| Class I antigen processing  | Ubiquitin     | AREL1   | 276   | 2.8  | 0.01 | 1.1  | 0.96 |
|                             |               | RBBP6   | 101   | 2.4  | 0.00 | 2.3  | 0.00 |
|                             |               | UBA7    | 265   | 2.0  | 0.05 | 4.1  | 0.00 |
|                             |               | UBE2A   | 1334  | 1.5  | 0.00 | 1.5  | 0.04 |
|                             |               | UBE2D1  | 165   | 5.7  | 0.00 | 5.1  | 0.00 |
|                             |               | UBE2H   | 696   | 3.2  | 0.00 | 2.5  | 0.02 |
|                             |               | UBE2B   | 841   | 1.6  | 0.01 | 1.4  | 0.36 |
|                             |               | UBE2K   | 142   | 1.6  | 0.00 | -1.1 | 0.73 |
|                             |               | UBE3A   | 192   | 2.2  | 0.04 | -1.1 | 0.95 |
|                             | Proteasome    | PSMA5   | 2805  | 2.6  | 0.00 | 1.6  | 0.41 |
|                             |               | PSMA6   | 6247  | 2.1  | 0.01 | 1.9  | 0.08 |
|                             |               | PSMB2   | 3866  | 1.6  | 0.01 | 1.4  | 0.21 |
|                             |               | PSMB5   | 159   | -1.7 | 0.05 | -1.1 | 0.94 |
|                             |               | PSMD6   | 1372  | 1.9  | 0.01 | 1.1  | 0.86 |
|                             |               | PSMD9   | 373   | 1.5  | 0.03 | -1.0 | 0.99 |
|                             |               | PSME4   | 161   | 2.3  | 0.01 | 1.0  | 0.97 |
|                             | Transporter   | TAP1    | 1295  | 2.8  | 0.01 | 4.2  | 0.00 |
|                             |               | TAP2    | 719   | 1.4  | 0.07 | 2.3  | 0.00 |
|                             |               | TAPBP   | 1514  | -1.3 | 0.28 | 1.9  | 0.01 |
| Class II antigen processing | Cathepsin     | CTSB    | 284   | -5.7 | 0.00 | -1.3 | 0.88 |
|                             |               | CTSC    | 1863  | 4.0  | 0.00 | 1.2  | 0.87 |
|                             |               | CTSH    | 56769 | 1.4  | 0.01 | -1.0 | 0.97 |
| Antigen presentation        | Th activation | TNFSF18 | 87    | 2.3  | 0.00 | 2.2  | 0.03 |
|                             | Coactivator   | CD40    | 1525  | 4.2  | 0.00 | 4.1  | 0.01 |

**Table S6.** Expression levels (EXP), false discovery rates (FDR) and fold differences (mutant vs WT, M/W and mutant vs mock infection, M/N) of chemokine and receptor genes differentially expressed by infected macrophages.

| Group                    | Gene           | EXP  | M/W  | FDR  | M/N  | FDR  |
|--------------------------|----------------|------|------|------|------|------|
| Apoptosis                | BAK1           | 395  | 2.9  | 0.02 | 1.5  | 0.67 |
|                          | BCL2L13        | 1167 | 2.0  | 0.00 | -1.0 | 0.96 |
|                          | BIK            | 82   | 2.6  | 0.00 | 2.3  | 0.01 |
|                          | CASP3          | 685  | 4.4  | 0.00 | 2.2  | 0.10 |
|                          | CASP4          | 1204 | 1.9  | 0.03 | 2.2  | 0.03 |
|                          | CASP7          | 651  | 2.9  | 0.00 | 3.7  | 0.00 |
|                          | CASP8          | 337  | 4.4  | 0.00 | 2.1  | 0.03 |
|                          | CASP10         | 98   | 6.0  | 0.00 | 6.1  | 0.00 |
|                          | CASP15         | 92   | 3.3  | 0.00 | 3.8  | 0.00 |
|                          | DAPK1          | 246  | 2.0  | 0.00 | -1.1 | 0.94 |
|                          | DAXX           | 2794 | 5.9  | 0.00 | 3.5  | 0.03 |
|                          | DIDO1          | 162  | 2.0  | 0.01 | -1.1 | 0.95 |
|                          | XAF1           | 314  | 13.1 | 0.00 | 11.1 | 0.00 |
| Death receptor signaling | TNF            | 2641 | 1.1  | 0.97 | 25.5 | 0.00 |
|                          | TNFSF10/TRAIL  | 179  | 80.5 | 0.00 | 46.7 | 0.00 |
|                          | TNFSF15/TL1A   | 214  | 5.6  | 0.00 | 3.5  | 0.06 |
|                          | TNFRSF1A/TNFR1 | 3943 | 2.3  | 0.00 | 1.0  | 0.98 |
|                          | TNFRSF1B/TNFR2 | 2987 | -1.8 | 0.01 | -1.9 | 0.02 |
|                          | TNFRSF3/LTBR   | 8211 | 2.5  | 0.01 | -1.4 | 0.61 |
|                          | TNFRSF6/FAS    | 181  | 3.3  | 0.00 | 3.5  | 0.01 |
|                          | TNFRSF10/DR5   | 203  | 3.1  | 0.00 | 8.4  | 0.00 |
|                          | FADD           | 145  | 3.0  | 0.00 | 1.3  | 0.68 |
|                          | RIPK1          | 1864 | 2.9  | 0.00 | 1.4  | 0.48 |
|                          | TRAF2          | 305  | 2.6  | 0.03 | 2.9  | 0.09 |
| Anti-apoptosis           | BIRC3          | 656  | 2.6  | 0.01 | 9.1  | 0.00 |
|                          | REL            | 100  | -3.2 | 0.03 | 1.5  | 0.77 |

**Table S7.** Expression levels (EXP), false discovery rates (FDR) and fold differences (mutant vs WT, M/W and mutant vs mock infection, M/N) of apoptosis related genes differentially expressed by infected macrophages.
